# Supplementary material
Source: MDPI journal article supplement (https://www.mdpi.com/1999-4893/15/5/144)
Supplement: s1 [file s1 › Algorithm S1.pdf]

---

**Algorithm S1:** Computation of a targeted UAP

---

**Input:** Set  $X$  of input images, target class  $y$ , classifier  $C$ , set  $Q$  of search directions, attack strength  $\epsilon$ , cap  $\xi$  on  $L_p$  norm of the perturbation, norm type  $p$  (1, 2, or  $\infty$ ), maximum number  $i_{\max}$  of iterations.

**Output:** non-targeted UAP vector  $\delta$

```
1:  $\delta \leftarrow \mathbf{0}$ ,  $r \leftarrow 0$ ,  $i \leftarrow 0$ 
2: while  $r < 1$  and  $i < i_{\max}$  do
3:   Pick a direction randomly:  $q \in Q$ 
4:   for  $\alpha \in \{-\epsilon, \epsilon\}$  do
5:      $\delta' \leftarrow \text{project}(\delta + \alpha q, p, \xi)$ 
6:     if  $\sum_{x \in X} p_C(y|x + \delta') > \sum_{x \in X} p_C(y|x + \delta)$  then
7:        $\delta \leftarrow \delta'$ 
8:       break
9:     end if
10:  end for
11:   $r \leftarrow |X|^{-1} \sum_{x \in X} \mathbb{I}(C(x + \delta) = y)$ 
12:   $i \leftarrow i + 1$ 
13: end while
```

---
