# Supplementary material
Source: MDPI journal article supplement (https://www.mdpi.com/1999-4893/15/5/144)
Supplement: s1 [file s1 › Table S1.pdf]

**Table S1:** List of the abbreviations of the image labels and label composition in each medical image dataset.

| Dataset     | Abbreviation     | Description                                                                            | #images |
|-------------|------------------|----------------------------------------------------------------------------------------|---------|
| Skin lesion | MEL (case)       | melanoma                                                                               | 335     |
|             | NV (control)     | melanocytic nevus                                                                      | 2016    |
|             | BCC              | basal cell carcinoma                                                                   | 144     |
|             | AKIEC            | actinic keratosis/Bowens disease (intraepithelial carcinoma)                           | 98      |
|             | BKL              | benign keratosis (solar lentigo/seborrheic keratosis/lichen planus-like keratosis)     | 335     |
|             | DF               | dermatofibroma                                                                         | 39      |
|             | VASC             | vascular lesions                                                                       | 48      |
| OCT         | CNV (case)       | choroidal neovascularization with neovascular membrane and associated subretinal fluid | 840     |
|             | DME              | diabetic macular edema with retinal-thickening-associated intraretinal fluid           | 840     |
|             | DRUSEN           | multiple drusen present in early age-related macular degeneration                      | 840     |
|             | NM (control)     | normal retina with preserved foveal contour and absence of any retinal fluid/edema     | 840     |
| Chest X-ray | NORMAL (control) | no pneumonia                                                                           | 270     |
|             | PNEUMONIA (case) | viral or bacterial pneumonia                                                           | 270     |
