# Supplementary material
Source: MDPI journal article supplement (https://www.mdpi.com/1999-4893/15/5/144)
Supplement: s1 [file s1 › Table S2.pdf]

**Table S2:** Fooling rates  $R_f$  (%) of nontargeted UAPs with  $p = 2$  against Inception V3 model for skin lesions image dataset under different random seed setting.  $N$  indicates the number of the input images used to generate a UAP. For the case  $N = 1000$ , the values for only 5 trials in addition to that in the main text are displayed trials because of relatively high computational costs.

| Trial        | $N = 500$ | $N = 1000$ |
|--------------|-----------|------------|
| in main text | 75.6      | 78.8       |
| 1            | 75.9      | 77.9       |
| 2            | 76.0      | 79.4       |
| 3            | 76.1      | 79         |
| 4            | 75.6      | 79.7       |
| 5            | 75.3      | 79.4       |
| 6            | 76.4      | —          |
| 7            | 74.0      | —          |
| 8            | 76.7      | —          |
| 9            | 76.4      | —          |
| 10           | 76.5      | —          |
